# Supplementary material for: Review of solutions to global warming, air pollution, and energy security
Source: Royal Society of Chemistry journal article supplement (doi:10.1039/b809990c), 2008-12-02
Supplement: b809990c.pdf [file b809990c.pdf]

# Review of Solutions to Global Warming, Air Pollution, and Energy Security

Mark Z. Jacobson

Department of Civil and Environmental Engineering, Stanford University, Stanford, California 94305-4020, USA; Email: [jacobson@stanford.edu](mailto:jacobson@stanford.edu); Tel: (650) 723-6836

*Energy and Environmental Science*

## Supplementary Information Appendix

Derivation of results used for this study.

| Energy required for vehicles                                 |                                                                              | Low case  | High case |
|--------------------------------------------------------------|------------------------------------------------------------------------------|-----------|-----------|
| A1(S1)                                                       | 2007 onroad vehicle miles traveled in the U.S. (mi/yr)                       | 3.237E+12 | 3.237E+12 |
| A2 (S2)                                                      | Total onroad vehicle fleet mileage (mpg)                                     | 1.711E+01 | 1.711E+01 |
| A3=A1/A2                                                     | Gallons of fuel (gas+diesel) used (gal/yr)                                   | 1.892E+11 | 1.892E+11 |
| A4                                                           | Lower heating value gasoline (MJ/kg)                                         | 4.400E+01 | 4.400E+01 |
| A5                                                           | Gasoline density (kg/m <sup>3</sup> )                                        | 7.500E+02 | 7.500E+02 |
| A6                                                           | Gallons per cubic meter (gal/m <sup>3</sup> )                                | 2.642E+02 | 2.642E+02 |
| A7=A4*A5/A6                                                  | Energy stored in gasoline (MJ/gal)                                           | 1.249E+02 | 1.249E+02 |
| A8=A3*A7                                                     | Energy needed to power gasoline vehicles (MJ/yr)                             | 2.363E+13 | 2.363E+13 |
| A9 (S2)                                                      | Gasoline vehicle efficiency (fraction)                                       | 1.600E-01 | 1.800E-01 |
| A10=A8*A9                                                    | Net energy to power U.S. onroad vehicles (MJ/yr)                             | 3.781E+12 | 4.254E+12 |
| A11                                                          | MJ per kWh                                                                   | 3.600E+00 | 3.600E+00 |
| A12=A10/A11                                                  | Net energy to power U.S. onroad vehicles (kWh/yr)                            | 1.050E+12 | 1.182E+12 |
| U.S. and world CO <sub>2</sub> emissions                     |                                                                              |           |           |
| B1 (S3)                                                      | U.S. onroad vehicle CO <sub>2</sub> 2007 (MT-CO <sub>2</sub> /yr)            | 1.466E+03 | 1.466E+03 |
| B2 (S3)                                                      | U.S. other-vehicle CO <sub>2</sub> (MT-CO <sub>2</sub> /yr)                  | 4.696E+02 | 4.696E+02 |
| B3 (S4)                                                      | U.S. coal-electricity CO <sub>2</sub> 2007 (MT-CO <sub>2</sub> /yr)          | 1.958E+03 | 1.958E+03 |
| B4 (S4)                                                      | U.S. natural gas-electricity CO <sub>2</sub> (MT-CO <sub>2</sub> /yr)        | 3.618E+02 | 3.618E+02 |
| B5 (S4)                                                      | U.S. oil electricity CO <sub>2</sub> (MT-CO <sub>2</sub> /yr)                | 5.450E+01 | 5.450E+01 |
| B5 (S4)                                                      | U.S. non-elect, non-transport. CO <sub>2</sub> (MT-CO <sub>2</sub> /yr)      | 1.661E+03 | 1.661E+03 |
| B6=B1+B2+B3+B4+B5                                            | U.S. total fossil CO <sub>2</sub> 2007 (MT-CO <sub>2</sub> /yr)              | 5.971E+03 | 5.971E+03 |
| B7 (S5)                                                      | World total CO <sub>2</sub> 2007 (MT-CO <sub>2</sub> /yr)                    | 3.345E+04 | 3.345E+04 |
| B8 (S6)                                                      | Fraction of upstream+combust onroad CO <sub>2</sub> from combust             | 7.500E-01 | 7.500E-01 |
| B9=B1/B8                                                     | U.S. onroad combust+fuel prod CO <sub>2</sub> 2007 (MT-CO <sub>2</sub> /yr)  | 1.955E+03 | 1.955E+03 |
| U.S. CO <sub>2</sub> emissions per kWh electricity generated |                                                                              |           |           |
| C1 (S7)                                                      | US electricity CO <sub>2</sub> (g-CO <sub>2</sub> e/kWh) (1998-2000 avg)     | 6.060E+02 | 6.060E+02 |
| C2 (S7)                                                      | US electricity CH <sub>4</sub> (g-CO <sub>2</sub> e/kWh) w/GWP 25            | 1.259E-01 | 1.259E-01 |
| C3 (S7)                                                      | US electricity N <sub>2</sub> O (g-CO <sub>2</sub> e/kWh) GWP 298            | 2.595E+00 | 2.595E+00 |
| C4=C1+C2+C3                                                  | Total US electricity CO <sub>2</sub> e (g-CO <sub>2</sub> e/kWh) (1998-2000) | 6.087E+02 | 6.087E+02 |

|                                                      |                                                                           |           |           |
|------------------------------------------------------|---------------------------------------------------------------------------|-----------|-----------|
| Wind turbine characteristics                         |                                                                           |           |           |
| D1(S8)                                               | Mean annual wind speed (m/s)                                              | 8.500E+00 | 7.000E+00 |
| D2 (S9)                                              | Turbine rated power (kW)                                                  | 5.000E+03 | 5.000E+03 |
| D3 (S9)                                              | Turbine rotor diameter (m)                                                | 1.260E+02 | 1.260E+02 |
| D4=(0.087*D1-D2/D3^2)                                |                                                                           |           |           |
| (S10)                                                | Turbine capacity factor                                                   | 4.246E-01 | 2.941E-01 |
| D5                                                   | Hours per year (hrs)                                                      | 8.760E+03 | 8.760E+03 |
| D6=D2*D4*D5                                          | Turbine energy output without losses (kWh/yr)                             | 1.860E+07 | 1.288E+07 |
| D7                                                   | Turbine effic. with transmission,conversion, array losses                 | 9.000E-01 | 8.500E-01 |
| D8=D6*D7                                             | Turbine energy output with losses (kWh/yr)                                | 1.674E+07 | 1.095E+07 |
| D9=(4*D3)*(7*D3)/10^6                                |                                                                           |           |           |
| (S10)                                                | Area for one turbine accounting for spacing (km <sup>2</sup> )            | 4.445E-01 | 4.445E-01 |
| D10                                                  | Diameter of turbine tubular tower (m)                                     | 4.000E+00 | 5.000E+00 |
| D11=PI*(D10/2)^2/10^6                                | Area of turbine tower touching ground (km <sup>2</sup> )                  | 1.257E-05 | 1.963E-05 |
| D12                                                  | Lifetime of wind turbine (yr)                                             | 3.000E+01 | 3.000E+01 |
| D13 (S11)                                            | Energy to manufacture one turbine (kWh/MW)                                | 4.277E+05 | 1.141E+06 |
| D14=D13*D2/(D12*1000)                                | Energy to manufacture one turbine (kWh/yr)                                | 7.128E+04 | 1.901E+05 |
| D15=0.5*(D6a+D6b)                                    | Avg turbine energy output before transmission (kWh/yr)                    | 1.574E+07 | 1.574E+07 |
| D16=D3*D2/D15                                        | Energy payback time (yr) for given turbine and winds                      | 1.359E-01 | 3.624E-01 |
| D17=D14*C4                                           | Single-turbine CO <sub>2</sub> emissions (g-CO <sub>2</sub> e/yr)         | 4.339E+07 | 1.157E+08 |
| D18=D17/D15                                          | Single-turbine CO <sub>2</sub> emissions (g-CO <sub>2</sub> e/kWh)        | 2.757E+00 | 7.352E+00 |
| D19                                                  | Time lag (yr) between planning and operation                              | 2.000E+00 | 5.000E+00 |
| D20                                                  | Time (yr) to refurbish after first lifetime                               | 1.000E+00 | 2.000E+00 |
| D21=C4*(D19+D20*(100yr/D12))/100yr                   | CO <sub>2</sub> emissions due to time lag (g-CO <sub>2</sub> e/kWh)       | 3.247E+01 | 7.102E+01 |
| D22=D21-D21                                          | Wind minus wind time lag CO <sub>2</sub> (g-CO <sub>2</sub> e/kWh)        | 0.000E+00 | 0.000E+00 |
| Wind-powered battery-electric vehicles (wind-BEV)    |                                                                           |           |           |
| E1 (S12)                                             | Battery effic. (delivered to input electricity ratio)                     | 8.600E-01 | 7.500E-01 |
| E2=A12/E1                                            | Energy required for batteries for U.S. BEV (kWh/yr)                       | 1.221E+12 | 1.576E+12 |
| E3=E2/D8                                             | Number of turbines required for U.S. wind-BEV                             | 7.298E+04 | 1.439E+05 |
| E4=E3*D9                                             | Area to separate turbines for U.S. wind-BEV (km <sup>2</sup> )            | 3.244E+04 | 6.397E+04 |
| E5                                                   | Square km per square mile                                                 | 2.590E+00 | 2.590E+00 |
| E6                                                   | Land area of U.S. (50 states) (mi <sup>2</sup> )                          | 3.537E+06 | 3.537E+06 |
| E7=E6*E5                                             | Land area of U.S. (50 states) (km <sup>2</sup> )                          | 9.162E+06 | 9.162E+06 |
| E8=E4/E7                                             | Fraction of U.S. land turbine spacing for wind-BEV                        | 3.541E-03 | 6.983E-03 |
| E9                                                   | Land area of California (mi <sup>2</sup> )                                | 1.560E+05 | 1.560E+05 |
| E10=E9*E5                                            | Land area of California (km <sup>2</sup> )                                | 4.039E+05 | 4.039E+05 |
| E11=E4/E10                                           | California land fraction for spacing for U.S. wind-BEV                    | 8.031E-02 | 1.584E-01 |
| E12=E3*D11/E5                                        | Footprint on ground U.S. wind-BEV (km <sup>2</sup> )                      | 9.170E-01 | 2.826E+00 |
| E13=E12/E7                                           | Fraction of U.S. land for footprint for all wind-BEV                      | 1.001E-07 | 3.084E-07 |
| E14=E3*D17/10^12                                     | Wind-BEV onroad vehicles CO <sub>2</sub> (MT-CO <sub>2</sub> e/yr)        | 3.167E+00 | 1.665E+01 |
| E15=(B9-E14)/B9                                      | Percent reduction FFOV CO <sub>2</sub> due to wind-BEV                    | 9.984E+01 | 9.915E+01 |
| E16=E15*B9/B6                                        | Percent reduction US CO <sub>2</sub> due to wind-BEV                      | 3.268E+01 | 3.245E+01 |
| E17 (AWEA, 2008S19)                                  | Water for turbine manufacture (gal-H <sub>2</sub> O/kWh)                  | 1.000E-03 | 1.000E-03 |
| E18=E17*D6*E3                                        | Gal-H <sub>2</sub> O/yr required to run U.S. wind-BEV                     | 1.357E+09 | 1.854E+09 |
| Wind-powered hydrogen fuel-cell vehicles (wind-HFCV) |                                                                           |           |           |
| F1 (S2, S13)                                         | hydrogen fuel cell efficiency (fraction)                                  | 5.000E-01 | 4.600E-01 |
| F2=A10/F1                                            | Energy required for U.S. HFCV (MJ/yr)                                     | 7.563E+12 | 9.248E+12 |
| F3                                                   | Lower heating value of hydrogen (MJ/kg-H <sub>2</sub> )                   | 1.200E+02 | 1.200E+02 |
| F4=F2/F3                                             | Mass of H <sub>2</sub> required for fuel for HFCV (kg-H <sub>2</sub> /yr) | 6.304E+10 | 7.709E+10 |
| F5 (S2, S13)                                         | Leakage rate hydrogen (fraction)                                          | 3.000E-02 | 3.000E-02 |

|                                                     |                                                             |             |             |
|-----------------------------------------------------|-------------------------------------------------------------|-------------|-------------|
| F6=F4/(1-F5)                                        | Mass of H2 required with leakage (kg-H2/yr)                 | 6.499E+10   | 7.947E+10   |
| F7                                                  | Higher heating value of hydrogen (MJ/kg-H2)                 | 1.418E+02   | 1.418E+02   |
| F8 (S14)                                            | Electrolyzer efficiency                                     | 7.380E-01   | 7.380E-01   |
| F9=F7/(F8*F2)                                       | Electrolyzer energy needed per kg-H2 (kWh/kg-H2)            | 5.337E+01   | 5.337E+01   |
| F10 (S15)                                           | Compressor Motor size (kW)                                  | 3.000E+01   | 3.000E+01   |
| F11 (S15)                                           | Electricity use as function of motor size (fraction)        | 6.500E-01   | 6.500E-01   |
| F12 (S15)                                           | Capacity of compressor (kg/year)                            | 3.030E+04   | 3.030E+04   |
| F13=D5*F10*F11/F12                                  | Compressor energy needed per kg-H2 (kWh/kg-H2)              | 5.639E+00   | 5.639E+00   |
| F14=F9+F13                                          | Electrolyzer+compressor en req. (kWh/kg-H2)                 | 5.901E+01   | 5.901E+01   |
| F15=F6*F14                                          | Electrolyzer+compressor Energy for all H2 (kWh/yr)          | 3.835E+12   | 4.690E+12   |
| F16=F15/D8                                          | Number of turbines required for wind-HFCV                   | 2.292E+05   | 4.284E+05   |
| F17=F16*D9                                          | Separation area for turbines for wind-HFCV (km2)            | 1.019E+05   | 1.904E+05   |
| F18=F17/E7                                          | Fraction of U.S. land for spacing for wind-HFCV             | 1.112E-02   | 2.078E-02   |
| F19=F17/E10                                         | Fraction of California land for spacing for wind-HFCV       | 2.522E-01   | 4.714E-01   |
| F20=D11*F16/E5                                      | Turbine ground footprint for wind-HFCV (km^2)               | 2.880E+00   | 8.411E+00   |
| F21=F16/E3                                          | Ratio of turbines, wind-HFCV:wind-BEV                       | 3.140E+00   | 2.977E+00   |
| F22=F16*D17/10^12                                   | Wind-HFCV CO2 from turbine lifecycle (MT-CO2e/yr)           | 9.944E+00   | 4.957E+01   |
| F23=(B9-F22)/B9                                     | Percent reduction FFOV CO2 due to wind-HFCV                 | 9.949E+01   | 9.746E+01   |
| F24=F23*B9/B6                                       | Percent reduction US CO2 due to wind-HFCV                   | 3.257E+01   | 3.190E+01   |
| F25                                                 | H2 Molecular weight (g/mol)                                 | 2.01588     | 2.01588     |
| F26                                                 | H2O molecular weight (g/mol)                                | 18.01528    | 18.01528    |
| F27=F26/F25                                         | Water required for electrolyzer (kg-H2O/kg-H2)              | 8.936682739 | 8.936682739 |
| F28                                                 | Density of liquid water (kg/m3)                             | 1000        | 1000        |
| F29=F27*A6/F28                                      | Water required for electrolyzer (gal-H2O/kg-H2)             | 2.361E+00   | 2.361E+00   |
| F30=F29*F6                                          | Water required for wind HFCV (gal-H2O/yr)                   | 1.534E+11   | 1.876E+11   |
| F31=E18*F16/E3                                      | Water for turbine manufacturing (gal-H2O/yr)                | 4.261E+09   | 5.517E+09   |
| F32=F30+F31                                         | Total water required (gal-H2O/yr)                           | 1.577E+11   | 1.931E+11   |
| Solar PV panel characteristics                      |                                                             |             |             |
| G1 (S16)                                            | Sample solar panel rated power (W)                          | 1.600E+02   | 1.600E+02   |
| G2 (S16)                                            | Mean capacity factor accounting for sunlight, PVs, inverter | 2.000E-01   | 1.000E-01   |
| G3=G1*G2*D5/1000                                    | Single-panel energy output before transmis. loss (kWh/yr)   | 2.803E+02   | 1.402E+02   |
| G4                                                  | Transmission efficiency                                     | 9.500E-01   | 9.000E-01   |
| G5=G3*G4                                            | Single-panel output w/ transmis. loss (kWh/yr)              | 2.663E+02   | 1.261E+02   |
| G6 (S16)                                            | Sample solar panel area (m2) plus walking space             | 1.888E+00   | 1.888E+00   |
| G7 (S17)                                            | Lifetime of solar panel (yr)                                | 3.000E+01   | 3.000E+01   |
| G8 (S17)                                            | Single-panel CO2 emissions (g-CO2e/kWh)                     | 1.900E+01   | 5.900E+01   |
| G9=G8*G3                                            | Single-panel CO2 emissions (g-CO2e/yr)                      | 5.326E+03   | 8.269E+03   |
| G10                                                 | Time lag (yr) between planning and operation                | 2.000E+00   | 5.000E+00   |
| G11                                                 | Time (yr) to refurbish after first lifetime                 | 1.000E+00   | 2.000E+00   |
| G12=C4*(G10+G11*100yr/<br>G7)/100yr                 | CO2 emissions due to time lag (g-CO2e/kWh)                  | 3.247E+01   | 7.102E+01   |
| G13=G12-D21                                         | Solar PV minus wind time lag CO2 (g-CO2e/kWh)               | 0.000E+00   | 0.000E+00   |
| Solar-PV powered battery-electric vehicles (PV-BEV) |                                                             |             |             |
| H1=E2/G5                                            | Number of solar panels required for US PV-BEV               | 4.586E+09   | 1.249E+10   |
| H2=H1*G6/10^6                                       | Land+roof (km^2) for solar panels to power US PV-BEV        | 8.658E+03   | 2.358E+04   |
| H3 (est.)                                           | Fraction of solar panels on rooftops                        | 3.000E-01   | 3.000E-01   |
| H4=H2*(1-H3)                                        | Land (km^2) for solar panels to power US PV-BEV             | 6.060E+03   | 1.650E+04   |
| H5=H4/E7                                            | Fraction of U.S. land for PV-BEV solar panels               | 6.615E-04   | 1.801E-03   |
| H6=H4/E10                                           | Fraction of California land for PV-BEV solar panels         | 1.500E-02   | 4.086E-02   |

|                                               |                                                               |            |           |
|-----------------------------------------------|---------------------------------------------------------------|------------|-----------|
| H7=H4/E12                                     | Ratio of solar-PV to wind land footprint for BEV              | 6.608E+03  | 5.841E+03 |
| H8=H4/E4                                      | Ratio of solar-PV to wind total spacing for BEV               | 1.868E-01  | 2.580E-01 |
| H9=H1*(G9+G13)/10^12                          | PV-BEV CO2 emissions from solar panels (MT-CO2e/yr)           | 2.443E+01  | 1.033E+02 |
| H10=100*(B9-H9)/B9                            | Percent reduction FFOV CO2 due to PV-BEV                      | 9.875E+01  | 9.472E+01 |
| H11=H109*B9/B6                                | Percent reduction US CO2 due to PV-BEV                        | 3.232E+01  | 3.100E+01 |
| H12 (S18,S19)                                 | Water for building/cleaning panels (gal-H2O/kWh)              | 4.000E-02  | 4.000E-02 |
| H13=H12*G3*H1                                 | Gal-H2O/yr required to run U.S. PV-BEV                        | 5.142E+10  | 7.002E+10 |
| Corn Ethanol for E85 vehicles                 |                                                               |            |           |
| I1 (S20)                                      | Efficiency of new E85 vehicles                                | 3.200E-01  | 2.600E-01 |
| I2=A10/I1                                     | Energy required for new E85 vehicles 2007 (MJ/yr)             | 1.182E+13  | 1.636E+13 |
| I3                                            | Lower heating value of ETOH (MJ/kg)                           | 2.680E+01  | 2.680E+01 |
| I4                                            | Density of ETOH (kg/m3)                                       | 7.870E+02  | 7.870E+02 |
| I5=I3*I4/A6                                   | Energy in ETOH (MJ/gal)                                       | 7.984E+01  | 7.984E+01 |
| I6=I2/(0.2*A7+0.8*I5)                         | Gallons E85 for onroad vehicles (gal)                         | 1.330E+11  | 1.841E+11 |
| I7=I6*0.8                                     | Gallons of ETOH in E85 for all U.S. onroad vehicles (gal)     | 1.064E+11  | 1.473E+11 |
| I8=I6-I7                                      | Gallons of gasoline in E85 for all U.S. onroad vehicles (gal) | 2.660E+10  | 3.683E+10 |
| I9 (S21)                                      | kg-ETOH per bushel of corn                                    | 7.860E+00  | 7.860E+00 |
| I10 (S21)                                     | Bushels per acre on irrigated + nonirrigated land             | 1.810E+02  | 1.400E+02 |
| I11                                           | Square meters per acre                                        | 4.047E+03  | 4.047E+03 |
| I12=I9*A6/I4                                  | Gal-ETOH per bushel of corn                                   | 2.638E+00  | 2.638E+00 |
| I13=I12*I10                                   | Gal-ETOH per acre of dry corn                                 | 4.775E+02  | 3.694E+02 |
| I14=I7/(I13*10^6)                             | Million acres of corn needed for all vehicles                 | 2.228E+02  | 3.988E+02 |
| I15=I14*I11                                   | Square km of corn for all vehicles                            | 9.016E+05  | 1.614E+06 |
| I16=I15/E7                                    | Fraction of U.S. land for corn-E85                            | 9.840E-02  | 1.762E-01 |
| I17=I15/E10                                   | Fraction of California land for corn-E85                      | 2.232E+00  | 3.995E+00 |
| I18 (S22)                                     | Total acres of harvested corn in U.S. 2003                    | 7.350E+07  | 7.350E+07 |
| I19 (S23)                                     | Acres of irrigated corn U.S. 2003                             | 9.750E+06  | 9.750E+06 |
| I20=I19/I18                                   | Fraction of harvested acres that are irrigated                | 1.327E-01  | 1.327E-01 |
| I21 (S23)                                     | Bushels per acre on irrigated land                            | 1.780E+02  | 1.780E+02 |
| I22=I21*I12                                   | Gal-ETOH per acre of dry corn                                 | 4.696E+02  | 4.696E+02 |
| I23 (S23)                                     | Water required for corn (acre-feet-H2O/acre-land)             | 1.200E+00  | 1.200E+00 |
| I24                                           | U.S. gallons per acre-foot                                    | 3.259E+05  | 3.259E+05 |
| I25=I23*I24/I22                               | Gal-H2O-irrigation/gal-ETOH                                   | 8.326E+02  | 8.326E+02 |
| I26=I25*I20                                   | Irrigated+nonirrigated gal-H2O/gal-ETOH                       | 1.104E+02  | 1.104E+02 |
| I27 (S24)                                     | Gal-H2O-energy /gal-ETOH                                      | 1.100E-01  | 1.100E-01 |
| I28 (S25)                                     | Gal-H2O-factory/gal-ETOH                                      | 4.500E+00  | 4.500E+00 |
| I29=I26+I27+I28                               | Total Gal-H2O/gal-ETOH                                        | 1.151E+02  | 1.151E+02 |
| I30=I29*I7                                    | Gal-H2O/yr required for all U.S. onroad vehicles              | 1.224E+13  | 1.695E+13 |
| I31 (S26)                                     | Total U.S. water use 2000 (gal/day)                           | 4.080E+11  | 4.080E+11 |
| I32=I31*365 days/yr                           | Total U.S. water use 2000 (gal/year)                          | 1.489E+14  | 1.489E+14 |
| I33=I30/I32                                   | Fraction of U.S. water demand for corn-E85                    | 8.220E-02  | 1.138E-01 |
| I34=I15/E7                                    | Ratio of corn-E85 to wind-BEV land footprint                  | 9.831E+05  | 5.711E+05 |
| I35 (S6, S28)                                 | Percent change in FFOV CO2 with 100% corn-E85                 | -2.400E+00 | 9.300E+01 |
| I36=I35*B9/B6                                 | Percent change in US CO2 with 100% corn-E85                   | -7.856E-01 | 3.044E+01 |
| I37=I36*0.30                                  | Percent change in US CO2 with 30% corn-E85                    | -2.357E-01 | 9.133E+00 |
| Cellulosic ethanol for E85 (cel-E85) vehicles |                                                               |            |           |
| J1 (S27, S29)                                 | Tons dry matter/acre                                          | 1.000E+01  | 2.300E+00 |
| J2 (S27)                                      | Gallons-ETOH/ton-dry matter                                   | 1.000E+02  | 8.000E+01 |
| J3=J1*J2                                      | Gallons-ETOH/acre                                             | 1.000E+03  | 1.840E+02 |

|                                                         |                                                     |            |            |
|---------------------------------------------------------|-----------------------------------------------------|------------|------------|
| J4=I7/(J3*10^6)                                         | Million acres of switchgrass for all vehicles       | 1.064E+02  | 8.006E+02  |
| J5=J4*I11                                               | Square km of switchgrass for all cel-E85            | 4.305E+05  | 3.240E+06  |
| J6=J5/E7                                                | Fraction of U.S. land for cel-E85                   | 4.699E-02  | 3.536E-01  |
| J7=J5/E10                                               | Fraction of California land for cel-E85             | 1.066E+00  | 8.021E+00  |
| J8=J5/E12                                               | Ratio of cel-E85 to wind-BEV land footprint         | 4.695E+05  | 1.147E+06  |
| J9=J5/E4                                                | Ratio of cel-E85 to wind-BEV total spacing          | 1.327E+01  | 5.064E+01  |
| J10=0.5*I26                                             | Irrigated+nonirrigated gal-H2O/gal-ETOH             | 5.522E+01  | 5.522E+01  |
| J11=J10+I27+I28                                         | Total Gal-H2O/gal-ETOH                              | 5.983E+01  | 5.983E+01  |
| J12=J11*I7                                              | Gal-H2O/yr required for U.S. cel-E85                | 6.366E+12  | 8.814E+12  |
| J13=J12/I32                                             | Fraction of U.S. water demand for cel-E85           | 4.275E-02  | 5.919E-02  |
| J14 (S6,S28)                                            | Percent change FFOV CO2 with 100% cel-E85           | -5.000E+01 | 5.000E+01  |
| J15=J14*B9/B6                                           | Percent change in US CO2 with 100% cel-E85          | -1.637E+01 | 1.637E+01  |
| J16=J15*0.30                                            | Percent change in US CO2 with 30% cel-E85           | -4.910E+00 | +4.910E+00 |
| Nuclear-powered battery-electric vehicles (nuclear-BEV) |                                                     |            |            |
| K1 (S30)                                                | Average nuclear power plant size (MW)               | 8.470E+02  | 8.470E+02  |
| K2 (S31)                                                | Capacity factor globally 2005                       | 8.590E-01  | 8.590E-01  |
| K3=K1*K2*1000*D5                                        | Energy per plant before transmission (kWh/yr)       | 6.374E+09  | 6.374E+09  |
| K4=G4                                                   | Transmission efficiency                             | 9.500E-01  | 9.000E-01  |
| K5=K3*K4                                                | Energy per plant after transmission (kWh/yr)        | 6.055E+09  | 5.736E+09  |
| K6=E2/K5                                                | Number nuclear plants to run U.S. nuclear-BEV       | 2.017E+02  | 2.747E+02  |
| K7 (S32)                                                | Nuclear CO2 lifecycle emissions (g-CO2e/kWh)        | 9.000E+00  | 7.000E+01  |
| K8 (S33)                                                | H2O evaporation nuclear (gal/kWh)                   | 4.000E-01  | 7.200E-01  |
| K9=K8*K3*K6                                             | Gal-H2O/yr required to run U.S. nuclear-BEVs        | 5.142E+11  | 1.260E+12  |
| K10=K9/I30                                              | Fraction of U.S. water demand for nuclear-BEV       | 3.453E-03  | 8.464E-03  |
| K11=K10*F16/E3                                          | Fraction of U.S. water demand for nuclear-HFCV      | 1.084E-02  | 2.519E-02  |
| K12 (S34)                                               | Land required for mining uranium (ha-year/GWh)      | 6.000E-02  | 6.000E-02  |
| K13 (S34)                                               | Footprint+buffer for nuclear facility (ha-year/GWh) | 2.600E-01  | 2.600E-01  |
| K14 (S34)                                               | Land for waste disposal for one plant (km^2)        | 8.000E-02  | 8.000E-02  |
| K15                                                     | km^2 per hectare                                    | 1.000E-02  | 1.000E-02  |
| K16=(K12+K13)*K15*K3/10^6+K14                           | Land (km^2) for one nuclear facility with buffer    | 2.048E+01  | 2.048E+01  |
| K17 (S35)                                               | Land (km^2) for nuclear facility buildings only     | 1.000E+00  | 4.000E+00  |
| K18=K12*K3*K15/10^6+K14+K17                             | Footprint on ground (km^2) for one facility         | 4.904E+00  | 7.904E+00  |
| K19=K16*K6                                              | Land with buffer (km^2) to run US nuclear BEV       | 4.130E+03  | 5.624E+03  |
| K20=K18*K6                                              | Footprint on ground (km^2) to run US nuclear-BEV    | 9.892E+02  | 2.171E+03  |
| K21=K19/E7                                              | Fraction of US land for nuclear-BEV                 | 4.508E-04  | 6.138E-04  |
| K22=K21/E7                                              | Fraction of US land for footprint of nuclear-BEV    | 1.080E-04  | 2.370E-04  |
| K23=K20/E12                                             | Ratio of nuclear to wind land footprint for BEV     | 1.079E+03  | 7.683E+02  |
| K24=K19/E4                                              | Ratio of nuclear to wind total spacing for BEV      | 1.273E-01  | 8.791E-02  |
| K25                                                     | Lifetime of nuclear power plant (yr)                | 4.000E+01  | 4.000E+01  |
| K26 (see text)                                          | Time lag (yr) between planning and operation        | 1.000E+01  | 1.900E+01  |
| K27                                                     | Time (yr) to refurbish after first lifetime         | 2.000E+00  | 4.000E+00  |
| K28=C4*(K26+K27*100yr/K25)/100yr                        | CO2 emissions due to time lag (g-CO2e/kWh)          | 9.131E+01  | 1.765E+02  |
| K29=K28-D21                                             | Nuclear minus wind time lag CO2 (g-CO2e/kWh)        | 5.884E+01  | 1.055E+02  |
| K30 (see text)                                          | Nuclear emissions from war/terrorism (g-CO2e/kWh)   | 0.000E+00  | 4.100E+00  |
| K31=(K7+K28+K30)*E2/10^12                               | Nuclear-BEV CO2 emissions (MT-CO2e/yr)              | 8.286E+01  | 2.830E+02  |
| K32=100*(B9-K31)/B9                                     | Percent reduction FFOV CO2 due to nuclear-BEVs.     | 9.576E+01  | 8.552E+01  |
| K33=K32*B9/B6                                           | Percent reduction US CO2 due to nuclear-BEVs        | 3.135E+01  | 2.799E+01  |

|                                                                                      |                                                            |           |           |
|--------------------------------------------------------------------------------------|------------------------------------------------------------|-----------|-----------|
| Hydroelectric powered battery-electric vehicles (hydro-BEV)                          |                                                            |           |           |
| L1 (S34)                                                                             | Selected plant size (MW)                                   | 1.296E+03 | 1.296E+03 |
| L2 (S36)                                                                             | Capacity factor                                            | 4.240E-01 | 4.240E-01 |
| L3=L1*L2*1000*D5                                                                     | Energy per plant before transmission (kWh/yr)              | 4.814E+09 | 4.814E+09 |
| L4=L3*G4                                                                             | Energy per plant after transmission (kWh/yr)               | 4.573E+09 | 4.332E+09 |
| L5=E2/L4                                                                             | Number of hydro plants to run U.S. hydro-BEV               | 2.671E+02 | 3.637E+02 |
| L6 (S34, S37)                                                                        | Hydro CO2 emissions (g-CO2e/kWh)                           | 1.700E+01 | 2.160E+01 |
| L7 (S38, see text)                                                                   | H2O evaporation hydroelectric (gal/kWh)                    | 4.500E+00 | 7.560E+00 |
| L8=L8*L3*L6                                                                          | Gal-H2O/yr required to run U.S. BEVs                       | 5.785E+12 | 1.323E+13 |
| L9=L8/I31                                                                            | Fraction of U.S. water demand for hydro-BEV                | 3.885E-02 | 8.887E-02 |
| L10=L3*F15/E2                                                                        | Fraction of U.S. water demand for hydro-HFCV               | 1.220E-01 | 2.645E-01 |
| L11 (S34)                                                                            | Area(km <sup>2</sup> ) required for single reservoir       | 6.531E+02 | 6.531E+02 |
| L12=L11*L5                                                                           | Area (km <sup>2</sup> ) required to run U.S. BEVs          | 1.744E+05 | 2.375E+05 |
| L13=L12/E7                                                                           | Fraction of US land for hydro-BEV                          | 1.904E-02 | 2.592E-02 |
| L14=L12/E12                                                                          | Ratio of hydro to wind land footprint for BEV              | 1.902E+05 | 8.405E+04 |
| L15=L12/E4                                                                           | Ratio of hydro to wind total spacing for BEV               | 5.377E+00 | 3.713E+00 |
| L16 (see text)                                                                       | Lifetime of hydro power plant (yr)                         | 8.000E+01 | 8.000E+01 |
| L17 (see text)                                                                       | Time lag (yr) between planning and operation               | 8.000E+00 | 1.600E+01 |
| L18                                                                                  | Time (yr) to refurbish after first lifetime                | 2.000E+00 | 3.000E+00 |
| L19=C4*(L17+L18*100yr/L16)/100yr                                                     | CO2 emissions due to time lag (g-CO2e/kWh)                 | 6.392E+01 | 1.202E+02 |
| L20=L19-D21                                                                          | Hydro minus wind time lag CO2 (g-CO2e/kWh)                 | 3.145E+01 | 4.920E+01 |
| L21=(L6+L20)*E2/10 <sup>12</sup>                                                     | Hydro-BEV CO2 emissions (MT-CO2e/yr)                       | 5.917E+01 | 1.116E+02 |
| L22=100*(B9-L21)/B9                                                                  | Percent reduction FFOV CO2 due to hydro-BEVs (%)           | 9.697E+01 | 9.429E+01 |
| L23=L22*B9/B6                                                                        | Percent reduction US CO2 due to hydro-BEVs (%)             | 3.174E+01 | 3.087E+01 |
| Concentrated solar power powered battery electric vehicles (CSP-BEV) without storage |                                                            |           |           |
| M1                                                                                   | Typical plant size (MW)                                    | 1.000E+02 | 1.000E+02 |
| M2 (S39)                                                                             | Capacity factor without storage                            | 2.500E-01 | 1.300E-01 |
| M3=M1*M2*1000*D5                                                                     | Energy per plant before transmission (kWh/yr)              | 2.190E+08 | 1.139E+08 |
| M4=G4                                                                                | Transmission efficiency                                    | 9.500E-01 | 9.000E-01 |
| M5=M3*M4                                                                             | Energy per plant after transmission (kWh/yr)               | 2.081E+08 | 1.025E+08 |
| M6=E2/M5                                                                             | Number CSP plants to run U.S. CSP-BEV                      | 5.870E+03 | 1.537E+04 |
| M7 (S40)                                                                             | Lifetime of CSP plant (yr)                                 | 3.000E+01 | 3.000E+01 |
| M8 (S40, S41)                                                                        | Energy payback time (yr)                                   | 4.167E-01 | 5.583E-01 |
| M9=0.5*(M3a+M3b)                                                                     | Avg energy per plant before transmission (kWh/yr)          | 1.752E+08 | 1.664E+08 |
| M10=M9*M8/M7                                                                         | Energy to manufacture one CSP plant (kWh/yr)               | 2.433E+06 | 3.098E+06 |
| M11=M10*C4                                                                           | Single-CSP plant CO2 emissions (g-CO2e/yr)                 | 1.148E+09 | 1.886E+09 |
| M12=M11/M9                                                                           | Single-CSP plant CO2 emissions (g-CO2e/kWh)                | 8.454E+00 | 1.133E+01 |
| M13 (S42)                                                                            | H2O consumption wet-cool parabolic trough (gal/kWh)        | 7.770E-01 | 7.770E-01 |
| M14=M13*M3*M6                                                                        | Gal-H2O/yr required to run U.S. CSP-BEV                    | 9.989E+11 | 1.360E+12 |
| M15=M14/I32                                                                          | Fraction of U.S. water demand for wet-cool CSP BEV         | 6.708E-03 | 9.134E-03 |
| M16=M14*F15/E2                                                                       | Fraction of U.S. water demand for wet-cool CSP HFCV        | 2.106E-02 | 2.719E-02 |
| M17 (S42)                                                                            | Land area required (km <sup>2</sup> ) per installed MW CSP | 1.900E-02 | 2.430E-02 |
| M18=M17*M1                                                                           | Land area required (km <sup>2</sup> ) for one 100 MW plant | 1.900E+00 | 2.430E+00 |
| M19=M18*M6                                                                           | Land area (km <sup>2</sup> ) required to run U.S. CSP-BEV  | 1.115E+04 | 3.735E+04 |
| M20=M19/E7                                                                           | Fraction of U.S. land for CSP-BEV                          | 1.217E-03 | 4.077E-03 |
| M21=M19/E10                                                                          | Fraction of California land for CSP-BEV                    | 2.761E-02 | 9.248E-02 |
| M22=M19/E12                                                                          | Ratio of CSP to wind footprint area for BEV                | 1.216E+04 | 1.322E+04 |



|                                                            |                                                         |           |           |
|------------------------------------------------------------|---------------------------------------------------------|-----------|-----------|
| M23=M19/E4                                                 | Ratio of CSP to wind spacing area for BEV               | 3.438E-01 | 5.839E-01 |
| M24 (see text)                                             | Time lag (yr) between planning and operation            | 2.000E+00 | 5.000E+00 |
| M25                                                        | Time (yr) to refurbish after first lifetime             | 1.000E+00 | 2.000E+00 |
| M26=C4*(M24+M25*100yr/M7)/100yr                            | CO2 emissions due to time lag (g-CO2e/kWh)              | 3.247E+01 | 7.102E+01 |
| M27=M26-D20                                                | CSP minus wind time lag CO2 (g-CO2e/kWh)                | 0.000E+00 | 0.000E+00 |
| M28=(M12+M27)*E2/10 <sup>12</sup>                          | CSP-BEV CO2 emissions (MT-CO2e/yr)                      | 1.033E+01 | 1.785E+01 |
| M29=100*(B9-M28)/B9                                        | Percent reduction FFOV CO2 due to CSP-BEVs (%)          | 9.947E+01 | 9.909E+01 |
| M30=M29*B9/B6                                              | Percent reduction US CO2 due to CSP-BEVs (%)            | 3.256E+01 | 3.243E+01 |
| Coal with CCS powering battery-electric vehicles (CCS-BEV) |                                                         |           |           |
| N1 (S34)                                                   | Typical plant size (MW)                                 | 4.250E+02 | 4.250E+02 |
| N2 (S34, S43)                                              | Capacity factor                                         | 8.500E-01 | 6.500E-01 |
| N3=N1*N2*1000*D5                                           | Energy per plant before transmission (kWh/yr)           | 3.165E+09 | 2.420E+09 |
| N4 (S41)                                                   | Increase in energy required for CCS (fraction)          | 1.400E-01 | 4.000E-01 |
| N5=N3/(1+N4)                                               | Energy available for transmission (kWh/yr)              | 2.776E+09 | 1.729E+09 |
| N6=N5*M4                                                   | Energy per plant after transmission (kWh/yr)            | 2.637E+09 | 1.556E+09 |
| N7=E2/N6                                                   | Number of coal plants to run U.S. CCS-BEV               | 4.631E+02 | 1.013E+03 |
| N8 (S44)                                                   | Coal CO2 direct emissions w/o CCS (g-CO2/kWh)           | 7.900E+02 | 1.017E+03 |
| N9 (S43)                                                   | CCS CO2 reduction efficiency                            | 9.000E-01 | 8.500E-01 |
| N10=N8*(1-N9)                                              | Coal CO2 direct emissions w/ CCS (g-CO2/kWh)            | 7.900E+01 | 1.526E+02 |
| N11(S44)                                                   | Coal non-direct lifecycle CO2 (g-CO2e/kWh)              | 1.760E+02 | 2.890E+02 |
| N12=N10+N11                                                | Total lifecycle coal-CCS CO2 (g-CO2e/kWh)               | 2.550E+02 | 4.416E+02 |
| N13 (S45)                                                  | H2O consumption from coal-fired power (gal/kWh)         | 4.900E-01 | 4.900E-01 |
| N14=N13*N3*N7                                              | Gal-H2O/yr required to run U.S. CCS-BEV                 | 7.181E+11 | 1.201E+12 |
| N15=N14/I32                                                | Fraction of U.S. water demand for CCS-BEV               | 4.822E-03 | 8.064E-03 |
| N16 (S34)                                                  | Land area for coal facility (km <sup>2</sup> )          | 1.290E+00 | 1.290E+00 |
| N17 (S34)                                                  | Land area for rail to transport coal (km <sup>2</sup> ) | 8.600E-02 | 8.600E-02 |
| N18 (S34)                                                  | Land area for coal mining (km <sup>2</sup> )            | 3.800E+00 | 3.800E+00 |
| N19=N16+N17+N18                                            | Total land area for one coal plant (km <sup>2</sup> )   | 5.176E+00 | 5.176E+00 |
| N20=N19*N7                                                 | Land area (km <sup>2</sup> ) to run U.S. CCS-BEV        | 2.397E+03 | 5.242E+03 |
| N21=N20/E7                                                 | Fraction of U.S. land for CCS-BEV                       | 2.616E-04 | 5.722E-04 |
| N22=N20/E12                                                | Ratio of CCS to wind footprint area for BEV             | 2.614E+03 | 1.855E+03 |
| N23=N20/E4                                                 | Ratio of CCS to wind spacing area for BEV               | 7.390E-02 | 8.194E-02 |
| N24                                                        | Lifetime of coal-CCS power plant (yr)                   | 3.500E+01 | 3.000E+01 |
| N25 (see text)                                             | Time lag (yr) between planning and operation            | 8.000E+00 | 1.600E+01 |
| N26                                                        | Time (yr) to refurbish after first lifetime             | 2.000E+00 | 3.000E+00 |
| N27=C4*(N25+N26*100yr/N24)/100yr                           | CO2 emissions due to time lag (g-CO2e/kWh)              | 8.348E+01 | 1.583E+02 |
| N28=N27-D21                                                | Coal-CCS minus wind time lag CO2 (g-CO2e/kWh)           | 5.102E+01 | 8.725E+01 |
| N29=N8-N10                                                 | CO2 injection rate into ground (g-CO2/kWh)              | 7.110E+02 | 8.645E+02 |
| N30 (see text)                                             | E-folding lifetime against leakage                      | 1.000E+05 | 5.000E+03 |
| N31=N29-N29*N30*(1-exp(-500yr/N30))/500yr                  | Average leakage over 500 years (g-CO2/kWh)              | 1.775E+00 | 4.182E+01 |
| N32=(N11+N28+N31)*E2/10 <sup>12</sup>                      | CCS-BEV CO2 emissions (MT-CO2e/yr)                      | 3.759E+02 | 8.990E+02 |
| N33=100*(B9-N32)/B9                                        | Percent reduction FFOV CO2 due to CCS-BEVs              | 8.077E+01 | 5.400E+01 |
| N34=N33*B9/B6                                              | Percent reduction US CO2 due to CCS-BEVs                | 2.644E+01 | 1.768E+01 |
| Geothermal-powered battery-electric vehicles (geo-BEV)     |                                                         |           |           |
| O1                                                         | Typical plant size (MW)                                 | 1.000E+02 | 1.000E+02 |

|                                                   |                                                                     |           |           |
|---------------------------------------------------|---------------------------------------------------------------------|-----------|-----------|
| O2 (S46)                                          | Capacity factor                                                     | 9.700E-01 | 8.900E-01 |
| O3=O1*O2*1000*D5                                  | Energy per plant before transmission (kWh/yr)                       | 8.497E+08 | 7.796E+08 |
| O4=O3*G4                                          | Energy per plant after transmission (kWh/yr)                        | 8.072E+08 | 7.017E+08 |
| O5=E2/M4                                          | Number of geothermal plants to run U.S. geo-BEV                     | 1.513E+03 | 2.245E+03 |
| O6 (S46, S47)                                     | Geothermal lifecycle CO2 (g-CO2e/kWh)                               | 1.510E+01 | 5.500E+01 |
| O7 (S46)                                          | H2O consumption from geothermal (gal/kWh)                           | 5.000E-03 | 5.000E-03 |
| O8=O7*O3*O5                                       | Gal-H2O/yr required to run U.S. geo-BEV                             | 6.428E+09 | 8.753E+09 |
| O9=O8/I32                                         | Fraction of U.S. water demand for geo-BEV                           | 4.316E-05 | 5.878E-05 |
| O10 (S46)                                         | Geothermal land requirement (m <sup>2</sup> /GWh)                   | 4.040E+02 | 4.040E+02 |
| O11=O10*O3                                        | Land area (km <sup>2</sup> ) for one plant                          | 3.433E-01 | 3.150E-01 |
| O12=O11*O5                                        | Land area (km <sup>2</sup> ) to run U.S. geo-BEV                    | 5.194E+02 | 7.072E+02 |
| O13=O12/E7                                        | Fraction of U.S. land for geo-BEV                                   | 5.669E-05 | 7.719E-05 |
| O14=O12/E12                                       | Ratio of geothermal to wind footprint area for BEV                  | 5.664E+02 | 2.503E+02 |
| O15=O12/E4                                        | Ratio of geothermal to wind spacing area for BEV                    | 1.601E-02 | 1.106E-02 |
| O16                                               | Lifetime of geothermal power plant (yr)                             | 4.000E+01 | 3.000E+01 |
| O17 (see text)                                    | Time lag (yr) between planning and operation                        | 3.000E+00 | 6.000E+00 |
| O18                                               | Time (yr) to refurbish after first lifetime                         | 1.000E+00 | 2.000E+00 |
| O19=C4*(O17+O18*100yr/O16)/100yr                  | CO2 emissions due to time lag (g-CO2e/kWh)                          | 3.348E+01 | 7.710E+01 |
| O20=O19-D21                                       | Geothermal minus wind time lag CO2 (g-CO2e/kWh)                     | 1.015E+00 | 6.087E+00 |
| O21=(O6+O20)*E2/10 <sup>12</sup>                  | Geo-BEV CO2 emissions (MT-CO2e/yr)                                  | 1.968E+01 | 9.624E+01 |
| O22=100*(B9-O21)/B9                               | Percent reduction FFOV CO2 due to geo-BEVs                          | 9.899E+01 | 9.508E+01 |
| O23=O22*B9/B6                                     | Percent reduction US CO2 due to geo-BEVs                            | 3.240E+01 | 3.112E+01 |
| Wave-powered battery-electric vehicles (wave-BEV) |                                                                     |           |           |
| P1 (S48)                                          | Device size (MW)                                                    | 7.500E-01 | 7.500E-01 |
| P2 (S48)                                          | Nominal wave power (kW/m)                                           | 5.500E+01 | 5.500E+01 |
| P3 (S48)                                          | Nominal energy per device before transmis. (kWh/yr)                 | 2.700E+06 | 2.700E+06 |
| P4 (S49)                                          | Actual wave power (kW/m)                                            | 3.400E+01 | 2.800E+01 |
| P5=(P7/P2)*P3/(P1*D5*1000)                        | Capacity factor                                                     | 2.540E-01 | 2.092E-01 |
| P6=P1*P5*1000*D5                                  | Energy per device before transmission (kWh/yr)                      | 1.669E+06 | 1.375E+06 |
| P7=P6*G4                                          | Energy per device after transmission (kWh/yr)                       | 1.586E+06 | 1.237E+06 |
| P8=E2/P7                                          | Number of wave devices to run U.S. wave-BEV                         | 7.703E+05 | 1.274E+06 |
| P9 (S50)                                          | Wave CO2 emissions (g-CO2e/kWh)                                     | 2.170E+01 | 2.170E+01 |
| P10 (S48)                                         | Width of wave device (m)                                            | 3.500E+00 | 3.500E+00 |
| P11 (S48)                                         | Length of wave device (m)                                           | 1.500E+02 | 1.500E+02 |
| P12=P10*P11/10 <sup>6</sup>                       | Ocean surface footprint (km <sup>2</sup> ) for one wave device      | 5.250E-04 | 5.250E-04 |
| P13=P12*P8                                        | Ocean surface footprint (km <sup>2</sup> ) to run U.S. wave-BEV     | 4.044E+02 | 6.686E+02 |
| P14 (S48)                                         | Ocean surface array spacing (km <sup>2</sup> ) for one wave device  | 2.500E-02 | 2.500E-02 |
| P15=P14*P8                                        | Ocean surface array spacing (km <sup>2</sup> ) to run U.S. wave-BEV | 1.926E+04 | 3.184E+04 |
| P16=P15/E7                                        | Fraction of U.S. land (over the ocean) for wave-BEV                 | 2.102E-03 | 3.475E-03 |
| P17=P13/E12                                       | Ratio of wave to wind footprint area for BEV                        | 4.410E+02 | 2.366E+02 |
| P18=P15/E4                                        | Ratio of wave to wind spacing area for BEV                          | 5.936E-01 | 4.977E-01 |
| P19 (S50)                                         | Lifetime of wave device (yr)                                        | 1.500E+01 | 1.500E+01 |
| P20 (see text)                                    | Time lag (yr) between planning and operation                        | 2.000E+00 | 5.000E+00 |
| P21                                               | Time (yr) to refurbish after first lifetime                         | 1.000E+00 | 2.000E+00 |
| P22=C4*(P20+P21*100yr/P19)/100yr                  | CO2 emissions due to time lag (g-CO2e/kWh)                          | 5.276E+01 | 1.116E+02 |
| P23=P22-D20                                       | Wave minus wind time lag CO2 (g-CO2e/kWh)                           | 2.029E+01 | 4.058E+01 |
| P24=(P9+P23)*E2/10 <sup>12</sup>                  | Wave-BEV CO2 emissions (MT-CO2e/yr)                                 | 5.129E+01 | 9.813E+01 |



|                                                     |                                                        |           |           |
|-----------------------------------------------------|--------------------------------------------------------|-----------|-----------|
| P25=100*(B9-P24)/B9                                 | Percent reduction FFOV CO2 due to wave-BEVs            | 9.738E+01 | 9.498E+01 |
| P26=P25*B9/B6                                       | Percent reduction US CO2 due to wave-BEVs              | 3.187E+01 | 3.109E+01 |
| P27 (AWEA, 2008S19)                                 | Water for device manufacture (gal-H2O/kWh)             | 1.000E-03 | 1.000E-03 |
| P28=P27*P6*P8                                       | Gal-H2O/yr required to run U.S. wave-BEV               | 1.286E+09 | 1.751E+09 |
| Tidal-powered battery-electric vehicles (tidal-BEV) |                                                        |           |           |
| Q1 (S51)                                            | Tidal turbine rated power (MW)                         | 1.000E+00 | 1.000E+00 |
| Q2 (S52)                                            | Capacity factor                                        | 3.500E-01 | 2.000E-01 |
| Q3=Q1*Q2*1000*D5                                    | Energy per device before transmission (kWh/yr)         | 3.066E+06 | 1.752E+06 |
| Q4=Q3*G4                                            | Energy per device after transmission (kWh/yr)          | 2.913E+06 | 1.577E+06 |
| Q5=E2/Q4                                            | Number of tidal devices to run U.S. tidal-BEV          | 4.193E+05 | 9.992E+05 |
| Q6 (S37)                                            | Tidal CO2 emissions (g-CO2e/kWh)                       | 1.400E+01 | 1.400E+01 |
| Q7 (S51)                                            | Turbine rotor diameter (m)                             | 1.150E+01 | 1.150E+01 |
| Q8 (S51)                                            | Ocean floor footprint (km^2) for one tidal device      | 2.880E-04 | 2.880E-04 |
| Q9=Q8*Q5                                            | Ocean floor footprint (km^2) to run U.S. tidal-BEV     | 1.208E+02 | 2.878E+02 |
| Q10=(4*Q7)*(7*Q7)/10^6<br>(S10)                     | Ocean floor array spacing (km^2) for one tidal device  | 3.703E-03 | 3.703E-03 |
| Q11=Q10*Q5                                          | Ocean floor array spacing (km^2) to run U.S. tidal-BEV | 1.553E+03 | 3.700E+03 |
| Q12=Q11/E7                                          | Fraction of U.S. land (over ocean floor) for tidal-BEV | 1.695E-04 | 4.038E-04 |
| Q13=Q9/E12                                          | Ratio of tidal to wind footprint area for BEV          | 1.317E+02 | 1.018E+02 |
| Q14=Q11/E4                                          | Ratio of tidal to wind spacing area for BEV            | 4.786E-02 | 5.784E-02 |
| Q15 (same as wave)                                  | Lifetime of tidal turbine (yr)                         | 1.500E+01 | 1.500E+01 |
| Q16 (see text)                                      | Time lag (yr) between planning and operation           | 2.000E+00 | 5.000E+00 |
| Q17                                                 | Time (yr) to refurbish after first lifetime            | 1.000E+00 | 2.000E+00 |
| Q18=C4*(Q16+Q17*100yr/<br>Q15)/100yr                | CO2 emissions due to time lag (g-CO2e/kWh)             | 5.276E+01 | 1.116E+02 |
| Q19=Q18-D21                                         | Tidal minus wind time lag CO2 (g-CO2e/kWh)             | 2.029E+01 | 4.058E+01 |
| Q20=(Q6+Q19)*E2/10^12                               | Tidal-BEV CO2 emissions (MT-CO2e/yr)                   | 4.188E+01 | 8.599E+01 |
| Q21=100*(B9-Q20)/B9                                 | Percent reduction FFOV CO2 due to tidal-BEVs           | 9.786E+01 | 9.560E+01 |
| Q22=Q21*B9/B6                                       | Percent reduction US CO2 due to tidal-BEVs             | 3.203E+01 | 3.129E+01 |
| Q23 (S19)                                           | Water for turbine manufacture (gal-H2O/kWh)            | 1.000E-03 | 1.000E-03 |
| Q24=Q23*Q3*Q5                                       | Gal-H2O/yr required to run U.S. tidal-BEV              | 1.286E+09 | 1.751E+09 |
| U.S. energy consumption                             |                                                        |           |           |
| R1 (S53)                                            | Coal electricity kWh/yr 2007                           | 2.024E+12 | 2.024E+12 |
| R2 (S53)                                            | Oil electricity kWh/yr 2007                            | 5.364E+10 | 5.364E+10 |
| R3 (S53)                                            | NatGas electricity kWh/yr 2007                         | 8.815E+11 | 8.815E+11 |
| R4=E2                                               | WBEV Vehicles kWh/yr 2007                              | 1.221E+12 | 1.576E+12 |
| R5=(B2+B5)*(R1+R2+R3+<br>R4)/(B6-B2-B5)             | Other kWh/yr                                           | 2.320E+12 | 2.517E+12 |
| Number of wind turbines required to displace CO2    |                                                        |           |           |
| S1=R1/D8                                            | Number of turbines to displace U.S. coal electricity   | 1.210E+05 | 1.849E+05 |
| S2=R2/D8                                            | Number of turbines to displace U.S. oil electricity    | 3.205E+03 | 4.900E+03 |
| S3=R3/D8                                            | Number of turbines to displace U.S. natgas electricity | 5.267E+04 | 8.052E+04 |
| S4=E3                                               | Number of turbines to power U.S. BEVs                  | 7.298E+04 | 1.439E+05 |
| S5=R5/D8                                            | Number of turbines to displace other U.S. sources      | 1.386E+05 | 2.299E+05 |
| S6=S1+S2+S3+S4+S5                                   | Number of turbines to displace all U.S. CO2            | 3.884E+05 | 6.441E+05 |
| S7=B7*S6/B6                                         | Number of turbines to displace world CO2               | 2.176E+06 | 3.608E+06 |

“Ref.” refers to references in the main text.

S1. United States Department of Transportation (2008) [www.fhwa.dot.gov/Environment/vmtext.htm](http://www.fhwa.dot.gov/Environment/vmtext.htm)

- S2. Ref. 18
- S3. Onroad-vehicle CO<sub>2</sub> was obtained by multiplying the 1999 rate of 1370 MT-CO<sub>2</sub>/yr from Ref. 18 by the ratio of 2007 to 1999 total U.S. petroleum CO<sub>2</sub> emissions from Energy Information Administration (2008a) U.S. carbon dioxide emissions from energy sources 2007 flash estimate, [www.eia.doe.gov/oiaf/1605/flash/flash.html](http://www.eia.doe.gov/oiaf/1605/flash/flash.html). Other vehicle CO<sub>2</sub> was obtained by subtracting onroad-vehicle CO<sub>2</sub> and oil-electricity CO<sub>2</sub> (present table) from U.S. petroleum CO<sub>2</sub>.
- S4. 2007 U.S. coal, natural gas, and oil electricity CO<sub>2</sub> were estimated by scaling 2006 emissions from Energy Information Administration (EIA) (2007b) Emissions of greenhouse gases report, [www.eia.doe.gov/oiaf/1605/ggrpt/carbon.html](http://www.eia.doe.gov/oiaf/1605/ggrpt/carbon.html) by the 2007 to 2006 ratio of total energy-related CO<sub>2</sub> coal, natural gas, and petroleum from Energy Information Administration (2008a) U.S. carbon dioxide emissions from energy sources 2007 flash estimate, [www.eia.doe.gov/oiaf/1605/flash/flash.html](http://www.eia.doe.gov/oiaf/1605/flash/flash.html). Non-electricity, non-transportation CO<sub>2</sub> was calculated as the total 2007 CO<sub>2</sub> from the same source minus the electricity and transportation emissions from the present table.
- S5. Marland, G., T.A. Boden, and R.J. Andres (2008) [http://cdiac.ornl.gov/trends/emis/em\\_cont.htm](http://cdiac.ornl.gov/trends/emis/em_cont.htm). 2004 data extrapolated to 2007 using the slope of the carbon emission change per year.
- S6. Ref. 58.
- S6. Energy Information Administration (EIA) (2002) Updated state-level greenhouse gas emission coefficients for electricity generation 1998-2000, <http://tonto.eia.doe.gov/ftproot/environment/e-supdoc-u.pdf>. Global warming potentials of 25 and 298 were applied to methane and nitrous oxide, respectively to obtain CO<sub>2</sub>e
- S7. Ref. 23.
- S9. Ref. 116.
- S10. Refs. 11, 33.
- S11. Ref. 37.
- S12. Ref. 117.
- S13. Schultz, M.G., T. Diehl, G.P. Brasseur, and W. Zittel (2003) Air pollution and climate-forcing impacts of a global hydrogen economy, *Science*, 302, 624-627.
- S14. National Renewable Energy Laboratory (NREL) (2004) Technology brief: Analysis of current-day commercial electrolyzers, NREL/FS-560-36705, [www.nrel.gov/docs/fy04osti/36705.pdf](http://www.nrel.gov/docs/fy04osti/36705.pdf).
- S15. Hydro-pac Inc. (2005) C03-40-70/140LX gas compressor for hydrogen specification sheet, [www.hydropac.com/HTML/hydrogen-compressor.html](http://www.hydropac.com/HTML/hydrogen-compressor.html).
- S16. Table 1, footnote c.
- S17. Refs. 40, 44-46,
- S18. Ref. 86
- S19. Ref. 85.
- S20. The low and high range encompass a 2005 Honda gasoline-electric hybrid vehicle tank-to-wheel efficiency of 30% and are both higher than the 2005 Honda gasoline vehicle tank-to-wheel efficiency of about 22% (Fig. 7 of Ref. 18).
- S21. Ref. 56. Also, in 2006, an average of 147.5 bushels of corn per harvested acre were produced in the U.S. (11,800 million bushels produced on 80 million acres).
- S22. Ref. 77.
- S23. Ref. 80.
- S24. King, C.W. and M.E. Webber (2008) The water intensity of the plugged-in automotive economy, *Environ. Sci. Technol.*, 42, 4305-4311.
- S25. Ref. 81.
- S26. Ref. 87.
- S27. Ref. 78.
- S28. Ref. 61.
- S29. Ref. 79.
- S30. European Nuclear Society (2008) Nuclear power plants, worldwide, <http://www.euronuclear.org/info/npp-ww.htm>.
- S31. Ref. 20.
- S32. Refs. 16, 49-51.
- S33. Ref. 84.
- S34. Ref. 31.
- S35 American Nuclear Society (2008) <http://www2.ans.org/pi/brochures/pdfs/power.pdf>
- S36 Energy Information Administration (EIA) (2006) Average capacity factors by energy source, [www.eia.doe.gov/cneaf/electricity/epa/figes3.html](http://www.eia.doe.gov/cneaf/electricity/epa/figes3.html), Table 1.

- S37. Ref. 40.
- S38. Ref. 83 for high value. The low value is estimated by attributing one-third of reservoir water to hydroelectric power.
- S39. Low value from Ref. 16 and Table 1 for California solar; high value from Ref. 22.
- S40. Ref. 39.
- S41. Ref. 38.
- S42. Ref. 86 gives CSP land area requirements 0.0203-0.0243 km<sup>2</sup>/MW without storage (and 0.0324-0.047 km<sup>2</sup>/MW with storage) (Table 3-1) and water requirements of 2.8 m<sup>3</sup>/MWh consumption and 0.14 m<sup>3</sup>/MWh for cleaning (Section A.1.3); Abengoa Solar (2008) Concentrated solar power, [http://www.solucar.es/sites/solar/en/tec\\_ccp.jsp](http://www.solucar.es/sites/solar/en/tec_ccp.jsp) gives 0.019 km<sup>2</sup>/MW without storage (and 0.038 km<sup>2</sup>/MW with storage). Ref. 16 gives 0.02 km<sup>2</sup>/MW without storage.
- S43. Ref. 32.
- S44. Ref. 49.
- S45. Ref. 85.
- S46. Ref. 27.
- S47. Ref. 43.
- S48. Pelamis Wave Power (2008) P-750 wave energy converter, <http://www.pelamiswave.com/media/pelamisbrochure.pdf>.
- S49. Kane, M. (2005) California small hydropower and ocean wave energy resources, California Energy Commission, CEC-500-2005-075, [www.energy.ca.gov/2005publications/CEC-500-2005-074/CEC-500-2005-074.PDF](http://www.energy.ca.gov/2005publications/CEC-500-2005-074/CEC-500-2005-074.PDF).
- S50. Ref. 41.
- S51. Ref. 97.
- S52. Ref. 28.
- S53. Energy Information Administration (2008b) Annual energy outlook 2008, <http://www.eia.doe.gov/oiaf/aeo/electricity.html>.
